# Supplementary material
Source: Springer Nature journal article supplement (https://www.springermedizin.de/resource/supplementary/12936_2010_1745_MOESM6_ESM.pdf/9541590)

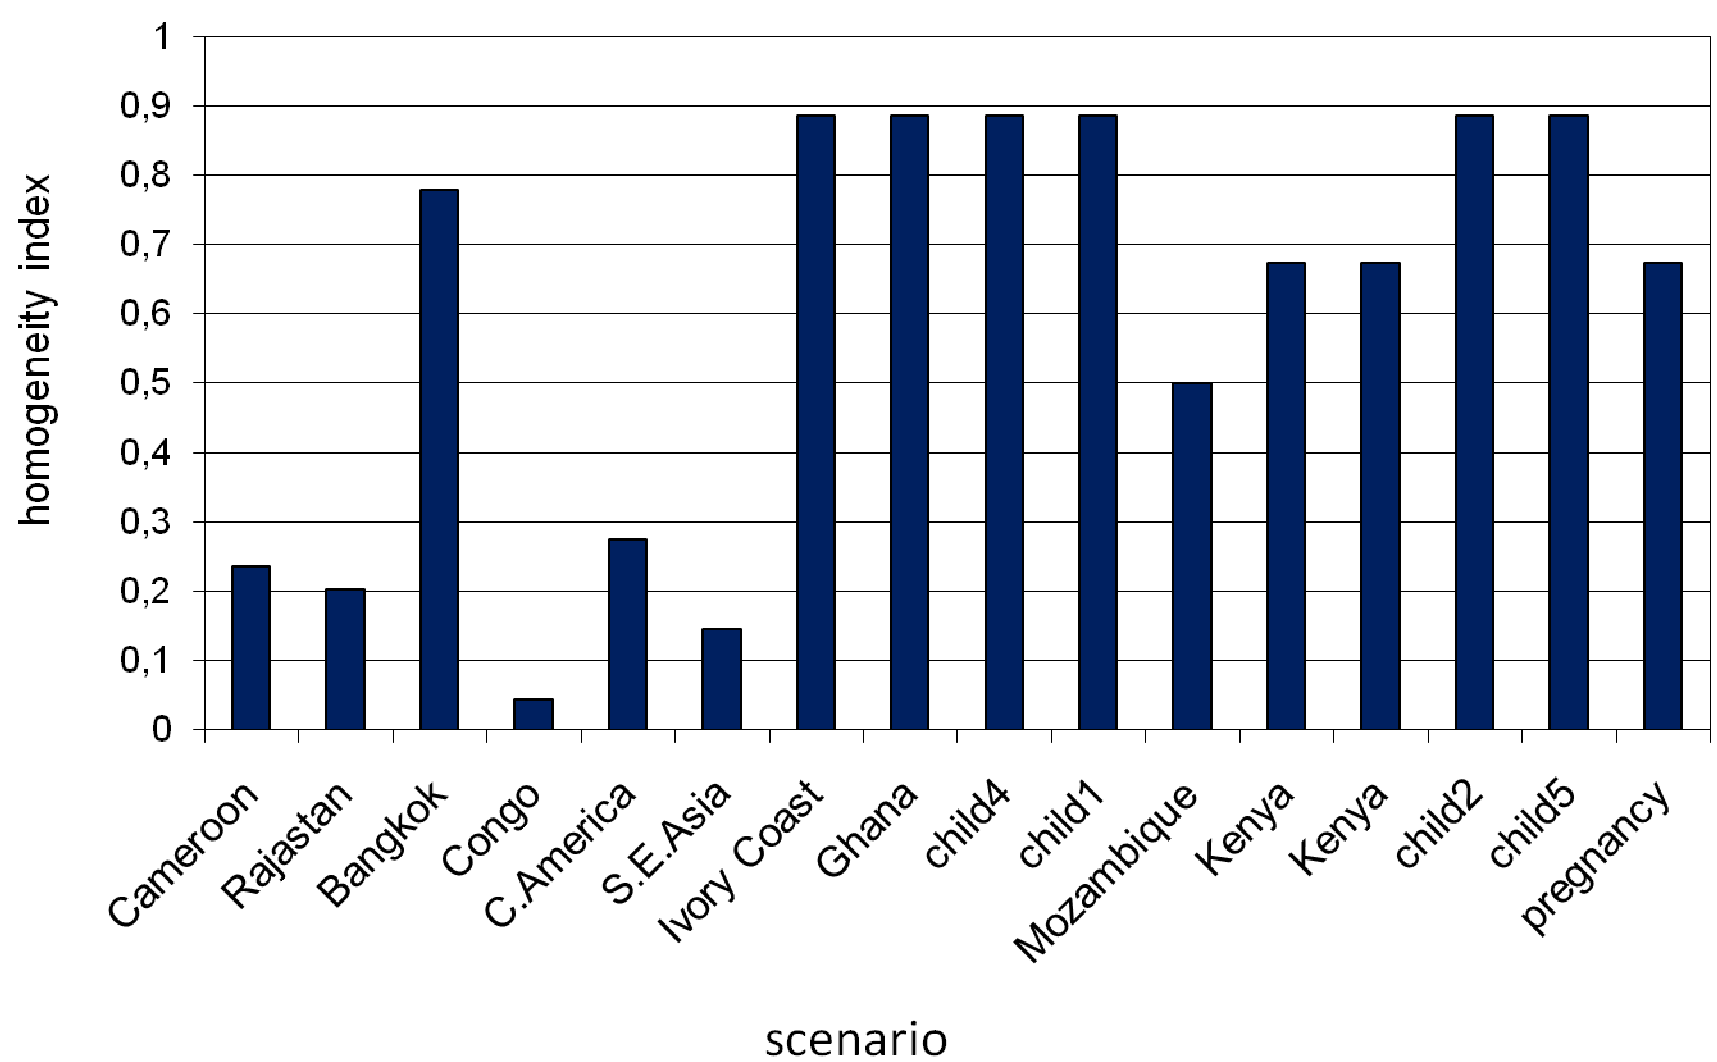

Supplement: MOESM6 [file 9541590]
